# Supplementary material for: Random and combinatorial mutagenesis for improved total production of secretory target protein in Escherichia coli
Source: PubMed Central journal article supplement (PMC7935960; doi:10.1038/s41598-021-84859-6), 2021-03-05
Supplement: 41598_2021_84859_MOESM1_ESM.pdf [file 41598_2021_84859_MOESM1_ESM.pdf]

# Random and combinatorial mutagenesis for improved total production of secretory target protein in *Escherichia coli*

## Supplementary material

David Gonzalez-Perez<sup>1,2</sup>, James Ratcliffe<sup>1</sup>, Shu Khan Tan<sup>1</sup>, Mary Chen May Wong<sup>1</sup>, Yi Pei Yee<sup>1</sup>, Natsai Nyabadza<sup>1</sup>, Jian-He Xu<sup>3</sup>, Tuck Seng Wong<sup>1,4\*</sup>, Kang Lan Tee<sup>1\*</sup>

<sup>1</sup>Department of Chemical & Biological Engineering, The University of Sheffield, Sir Robert Hadfield Building, Mappin Street, Sheffield S1 3JD, UK

<sup>2</sup>Moffitt Cancer Center & Research Institute, Department of Drug Discovery, Stable Research Building, 12902 Magnolia Dr, Tampa, FL 33612, USA

<sup>3</sup>Laboratory of Biocatalysis and Bioprocessing, State Key Laboratory of Bioreactor Engineering, East China University of Science and Technology, 130 Meilong Road, Shanghai 200237, People's Republic of China

<sup>4</sup>National Center for Genetic Engineering and Biotechnology, 113 Thailand Science Park, Phahonyothin Road, Khlong Luang, Pathum Thani 12120, Thailand

\*Address correspondence to:

**Dr. Kang Lan Tee**

Email: [k.tee@sheffield.ac.uk](mailto:k.tee@sheffield.ac.uk)

Tel: +44 (0)114 222 7507

Or

**Dr. Tuck Seng Wong**

Email: [t.wong@sheffield.ac.uk](mailto:t.wong@sheffield.ac.uk)

Tel: +44 (0)114 222 7591

**Table S1:** Primers used in this study

| <b>Primer</b>    | <b>Sequence (5' → 3')</b>                          |
|------------------|----------------------------------------------------|
| NdeI-Tfu0937-F   | GGAATTCCATATGACCAGCCAAAGCACCAC                     |
| EcoRI-Tfu0937-R  | CCGGAATTCTCATTACTCTTGACCAAAAATACC                  |
| BamHI-Lipase6B-F | GATCGGATCCATGGCGGAGCACAACC                         |
| Lipase6B-EcoRI-R | GATCGAATTCTTAGTTCGTGTTCTGG                         |
| BamHI-RFP-F      | ACGGGATCCGCGAGTAGCGAAGACG                          |
| EcoRI-RFP-R      | ACCGGAATTCTTAAGCACCGGTGGAGTG                       |
| OsmY-DirEv-F     | GTACCATATGACCATGACCCGTC                            |
| OsmY-DirEv-R     | CCGCGGATCCGCTACCTTTGGTCTTC                         |
| OsmY-V191E-FP    | GTTGACGGCGAGAAGAGCGTTAAAAACGATCTGAAGA<br>CCAAAGGTA |
| OsmY-V191E-RP    | AACGCTCTTCTCGCCGTCAACCGCTTTCGCGATGCTCT<br>CCGCACGA |
| OsmY-S154R-FP    | ATCGTTCCGCGCCGTACGTGAAGGTTGAAACCACCG<br>ACGGCGTGG  |
| OsmY-S154R-RP    | CACGTGACGGCGCGGAACGATATCGTCCGCCAGCAGT<br>TTCGCCTTA |
| OsmY-L6P-FP      | ATGACCCGTCCGAAGATTAGCAAAACCCTGCTGGCGG<br>TGATGCTGA |
| OsmY-L6P-RP      | GCTAATCTTCGGACGGGTCATGGTCATATGTATATCTC<br>CTTCTTAA |

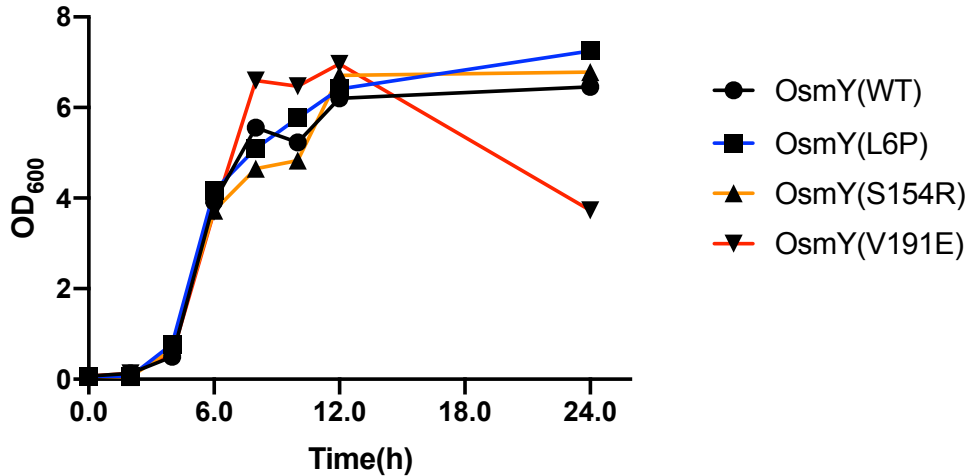

**Figure S1:** Growth curve of single site-directed mutants measured at 600 nm. Cells were cultivated in 20-mL flask cultures using 2×TY auto-induction media at 37 °C. Culture was inoculated using 1:100 dilution and 0.5 mL culture was sampled at various time points for cell density (OD<sub>600</sub>) measurement. Wildtype and variants are represented using different colours; OsmY(WT) – black line, OsmY(L6P) – blue line, OsmY(S154R) – orange line and OsmY(V191E) – red line.

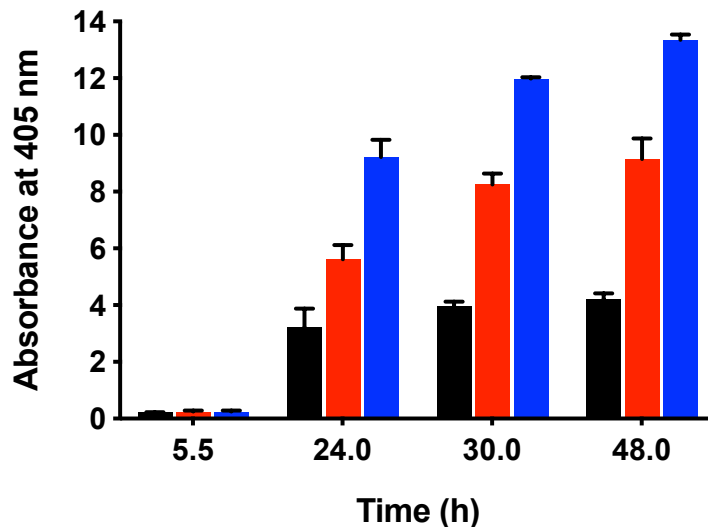

**Figure S2:** Characterization of improved variants in 50-mL flask cultures. The activity of extracellular OsmY-Tfu0937 was determined with the pNPG assay using an absorbance at 405 nm. Cultures were inoculated using 1:100 dilution. OsmY(WT) type and variants were expressed using C41(DE3) in 2TY auto-induction media and at 37 °C and 200 rpm. The activities of wildtype and variants are represented using different colours; OsmY(WT) (black), OsmY(TOA4) (red) and OsmY(M3) (blue). Experiments were performed in triplicates.

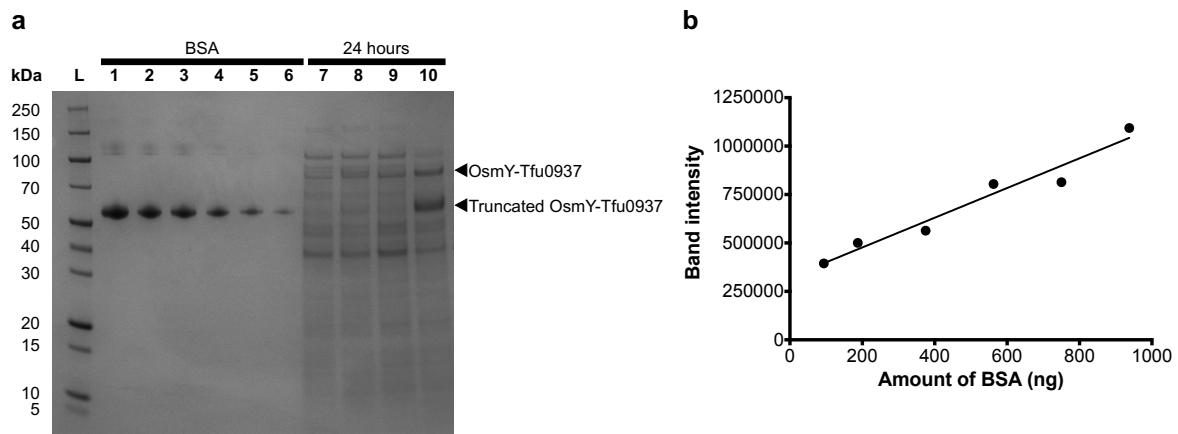

**Figure S3: (a)** SDS-PAGE of BSA standards and spent medium from 24 h cultivation. Lane L: protein marker, Lane 1: 250 µg/mL BSA, Lane 2: 200 µg/mL BSA, Lane 3: 150 µg/mL BSA, Lane 4: 100 µg/mL BSA, Lane 5: 50 µg/mL BSA, Lane 6: 25 µg/mL BSA, Lane 7: OsmY(WT)-Tfu0937 in BL21(DE3), Lane 8: OsmY(M3)-Tfu0937 in BL21(DE3), Lane 9: OsmY(WT)-Tfu0937 in C41(DE3), Lane 10: OsmY(M3)-Tfu0937 in C41(DE3). **(b)** Calibration curve for protein quantification, obtained by densitometry of the BSA standards in (a) using ImageJ software.

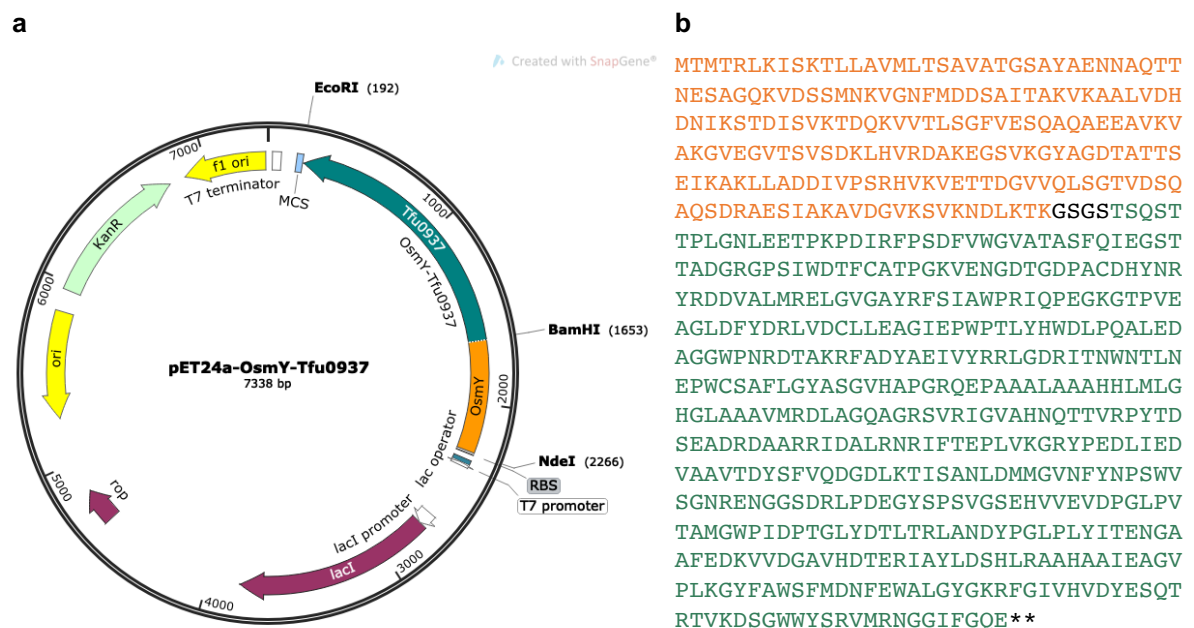

**Figure S4: (a)** Plasmid map of pET24a-OsmY-Tfu0937. **(b)** Amino acid sequence of OsmY-Tfu0937. The OsmY wildtype sequence is shown in orange, Tfu0937 sequence in green, and GSGS linker sequence in black.
